# Supplementary material for: Novice Point-of-Care Ultrasound for the Diagnosis of Acute Dyspnea in the Emergency Department
Source: Research Square preprint supplement (doi:10.21203/rs.3.rs-6491287/v1), 2025-08-27
Supplement: Supplementary file 1 [file 3ea78523c429d90d6572c6d7.docx]

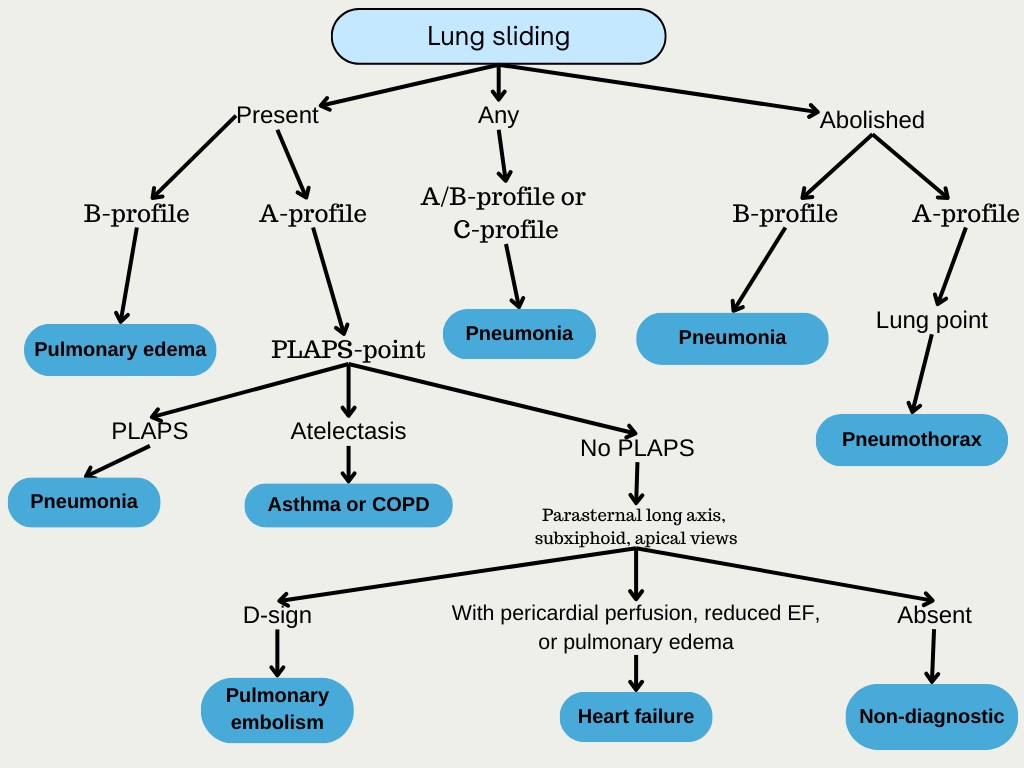


Supplemental Figure 1: Modified BLUE protocol for the diagnosis of dyspnea in the emergency department.
